# Supplementary material for: Natural sliced wood veneer as a universal porous lightweight substrate for supercapacitor electrode materials
Source: Royal Society of Chemistry journal article supplement (doi:10.1039/c7ra10306a), 2017-01-01
Supplement: c7ra10306a1.pdf [file c7ra10306a1.pdf]

## Supporting Information

### Natural Sliced Wood Veneer as a Universal Porous Lightweight Substrate for Supercapacitor Electrode Materials

Shaoyi Lyu,<sup>a\*</sup> Yanping Chen,<sup>a,c</sup> Shenjie Han,<sup>a</sup> Limin Guo,<sup>a</sup> Na Yang<sup>a</sup> and Siqun Wang<sup>b,a\*</sup>

<sup>a</sup> Research Institute of Wood Industry, Chinese Academy of Forestry, Beijing 100091, China.

<sup>b</sup> Center for Renewable Carbon, University of Tennessee, Knoxville, Tennessee, 37996, USA.

<sup>c</sup> Beijing Engineering Research Center of Cellulose and Its Derivatives, School of Materials Science and Engineering, Beijing Institute of Technology, Beijing 100081, China.

\*Author for correspondence. Email: lvsy@caf.ac.cn (S. Lyu), swang@utk.edu (S. Wang).

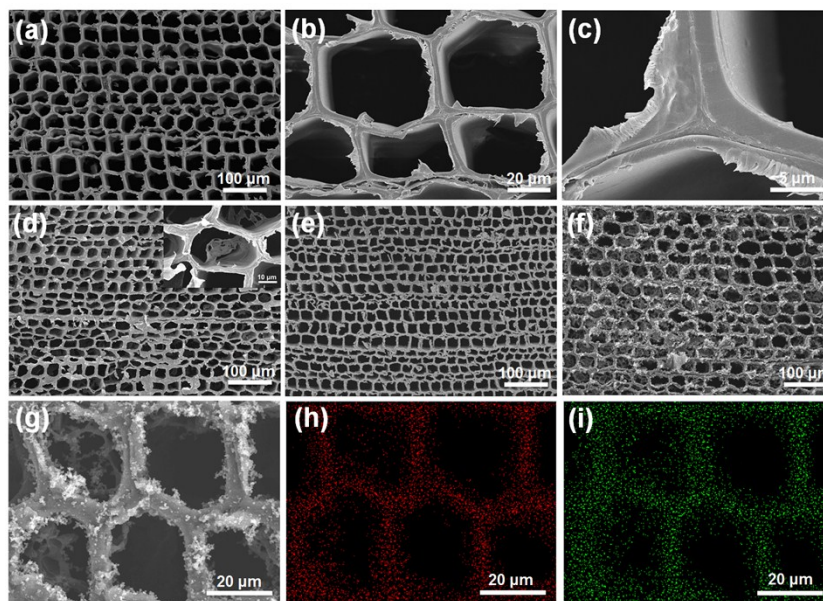

**Fig. S1** (a-c) Surface morphology SEM images of natural wood at different scales. Surface morphology SEM images of (d) RGO wood, (e) PANI/RGO wood and (f) PPy/RGO wood at a small magnification. The inset of (d) shows an enlarged scale of RGO wood. (g-i) SEM/EDS image of the PPy/RGO wood. (h and i) Corresponding elemental mapping images of (h) N, and (i) C.

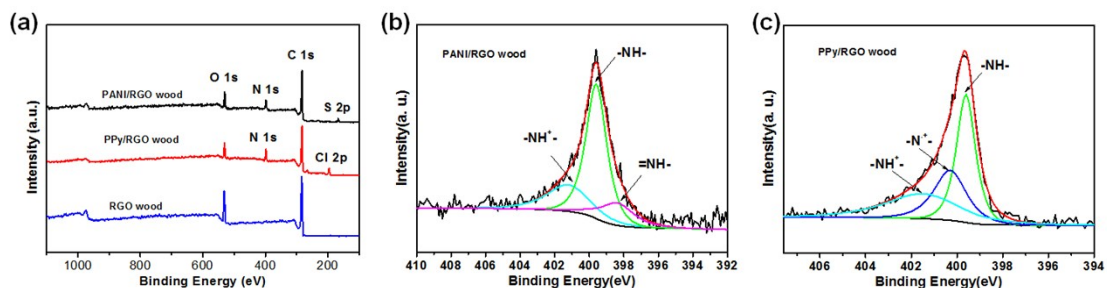

**Fig. S2.** (a) XPS wide-region scan spectrum of the PANI/RGO wood, PPy/RGO wood and RGO wood. High-resolution XPS N 1s spectrum of the (b) PANI/RGO wood and (c) PPy/RGO wood.

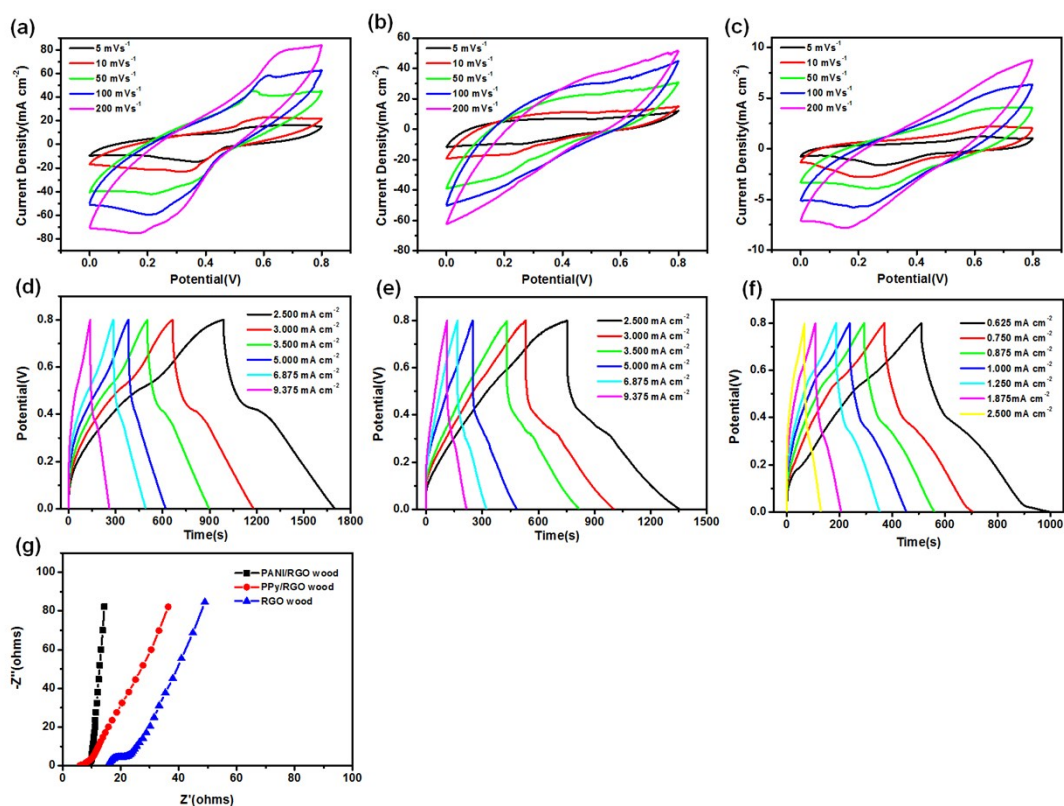

**Fig. S3.** CV curves of the (a) PANI/RGO wood, (a) PPy/RGO wood and (c) RGO wood electrodes at different sweep rates. GCD curves of (d) PANI/RGO wood, (e) PPy/RGO wood and (f) RGO wood electrodes at different current densities. (g) Nyquist plots of three wood electrodes. The electrochemical performances of three wood electrodes here were under three-electrode tests.

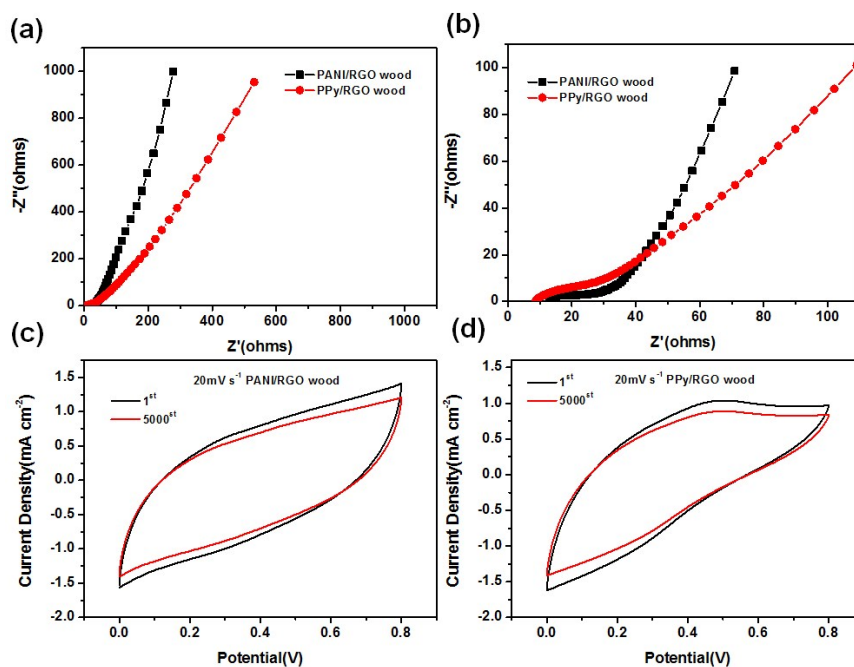

**Fig. S4.** (a) Nyquist plots of PANI/RGO wood and PPy/RGO wood electrodes assembled supercapacitor. (b) The enlarged scale of (a) at high frequency. CV curves of (c) PANI/RGO wood and (d) PPy/RGO wood electrodes assembled supercapacitor for cycling stability test.

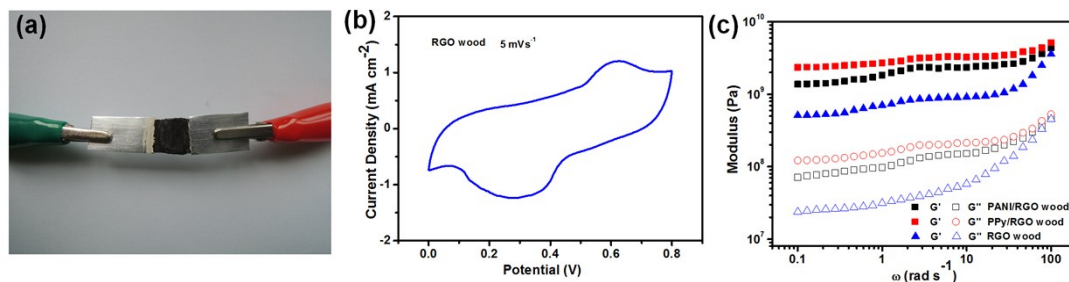

**Fig. S5.** (a) The assembled all-solid-state supercapacitor device. (b) CV curve of the RGO wood electrode at a sweep rate of  $5\text{mVs}^{-1}$ . (c) Dynamic mechanical properties of PANI/RGO, PPy/RGO and RGO wood electrodes.

**Tab. S1.** The electrochemical performances of various electrodes.

| Scaffolds     | Active material                                                          | Current density                                                                 | Specific capacitance                                                                                                                                                 | References |
|---------------|--------------------------------------------------------------------------|---------------------------------------------------------------------------------|----------------------------------------------------------------------------------------------------------------------------------------------------------------------|------------|
| free-standing | graphene/polyaniline                                                     | 1 A g <sup>-1</sup> (3-electrode)<br>1 A g <sup>-1</sup> (2-electrode)          | 777 F g <sup>-1</sup> (3-electrode)<br>665 F g <sup>-1</sup> (2-electrode)                                                                                           | S1         |
| free-standing | polyaniline/N-doped porous carbon                                        | 1 A g <sup>-1</sup> (3-electrode)                                               | 755 F g <sup>-1</sup> (3-electrode)                                                                                                                                  | S2         |
| free-standing | polyaniline/activated wood derived carbon                                | 2 A g <sup>-1</sup> (3-electrode)                                               | 372 F g <sup>-1</sup> (3-electrode)                                                                                                                                  | S3         |
| cotton fabric | polypyrrole/reduced graphene oxide                                       | 0.6 mA cm <sup>-2</sup> (3-electrode)                                           | 336 F g <sup>-1</sup> (3-electrode)                                                                                                                                  | S4         |
| paper         | graphite/polyaniline                                                     | 0.5 mA cm <sup>-2</sup> (3-electrode)                                           | 355.6 mF cm <sup>-2</sup> (3-electrode)                                                                                                                              | S5         |
| free-standing | carbon<br>nanotube/polyaniline                                           | 1 mA cm <sup>-2</sup> (3-electrode)<br>1 mA cm <sup>-2</sup> (2-electrode)      | 680 mF cm <sup>-2</sup> (3-electrode)<br>184.6 mF cm <sup>-2</sup> (2-electrode)                                                                                     | S6         |
| wood          | polyaniline/reduced graphene oxide<br>polypyrrole/reduced graphene oxide | 2.5 mA cm <sup>-2</sup> (3-electrode)<br>0.50 mA cm <sup>-2</sup> (2-electrode) | 931.92 F g <sup>-1</sup> (3-electrode)<br>298.52 F g <sup>-1</sup> (2-electrode)<br>848.01 F g <sup>-1</sup> (3-electrode)<br>258.82 F g <sup>-1</sup> (2-electrode) | This work  |

## Supplementary Reference

- S1. K. Li, J. Liu, Y. Huang, F. Bu and Y. Xu, *J. Mater. Chem. A*, 2017, **5**, 5466-5474
- S2. S. N. Guo, H. K. Shen, Z. F. Tie, S. Zhu, P. H. Shi, J. C. Fan, Q. J. Xu and Y. L. Min, *J. Power Sources*, 2017, **359**, 285-294
- S3. D. Liu, S. Yu, Y. Shen, H. Chen, Z. Shen, S. Zhao, S. Fu, Y. Yu and B. Bao, *Ind. Eng. Chem. Res.*, 2015, **54**, 12570-12579
- S4. J. Xu, D. Wang, Y. Yuan, W. Wei, L. Duan, L. Wang, H. Bao and W. Xu, *Org. Electron.*, 2015, **24**, 153-159.
- S5. B. Yao, L. Yuan, X. Xiao, J. Zhang, Y. Qi, J. Zhou, J. Zhou, B. Hu and W. Chen, *Nano Energy*, 2013, **2**, 1071-1078.
- S6. S. Zeng, H. Chen, F. Cai, Y. Kang, M. Chen and Q. Li, *J. Mater. Chem. A*, 2015, **3**, 23864-23870.
